# Supplementary material for: TORC1 controls G1–S cell cycle transition in yeast via Mpk1 and the greatwall kinase pathway
Source: PubMed Central journal article supplement (PMC4579850; doi:10.1038/ncomms9256), 2015-09-10
Supplement: ncomms9256-s1.pdf [file ncomms9256-s1.pdf]

## Supplementary Figures

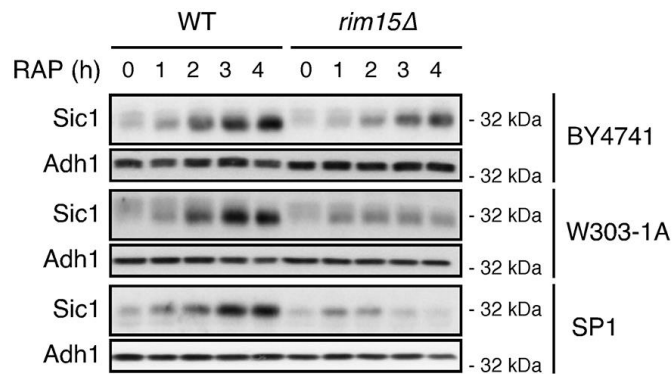

**Supplementary Figure 1 | Rim15 ensures Sic1 accumulation following TORC1 inactivation independently of the yeast strain background.** The levels of endogenous Sic1, in exponentially growing (0 h) and rapamycin-treated (RAP; 1-4 h) BY4741, W303-1A, and SP1 wild-type (WT) and respective isogenic *rim15Δ* mutant cells, were determined by immunoblot analyses using polyclonal anti-Sic1 antibodies. Adh1 levels served as loading controls.

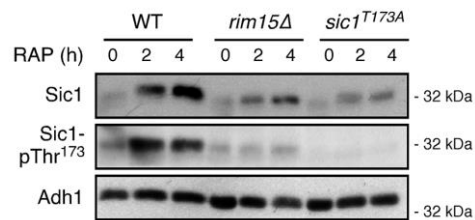

**Supplementary Figure 2 | Mutation of Thr<sup>173</sup> to Ala in Sic1, like loss of Rim15, compromises normal Sic1 accumulation in rapamycin-treated cells.** Sic1 levels and phosphorylation of Thr<sup>173</sup> in Sic1 (Sic1-pThr<sup>173</sup>) were determined in exponentially growing (0 h) and rapamycin-treated (RAP; 2 and 4 h) cells with the indicated genotypes by immunoblot analyses using polyclonal anti-Sic1 and phosphospecific anti-Sic1-pThr<sup>173</sup> antibodies, respectively. Adh1 levels served as loading controls.

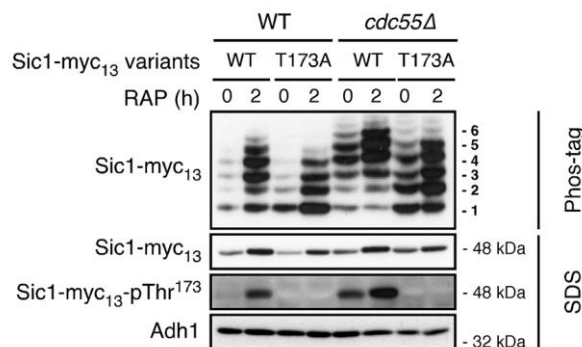

**Supplementary Figure 3 | Phos-tag phosphate affinity gel electrophoresis analysis of genomically myc<sub>13</sub>-tagged Sic1 or Sic1<sup>T173A</sup>.** Sic1-myc<sub>13</sub> or Sic1<sup>T173A</sup>-myc<sub>13</sub> were analyzed by phos-tag phosphate affinity and SDS gel electrophoresis (followed by immunoblot analysis using anti-myc or anti-Sic1-pThr<sup>173</sup> antibodies) in extracts from exponentially growing (0 h) and rapamycin-treated (RAP; 2 h) WT and *cdc55Δ* strains. The 6 differentially phosphorylated Sic1-myc<sub>13</sub> isoforms are numbered sequentially from 1 to 6 (right side of the panels). Adh1 levels served as loading controls.

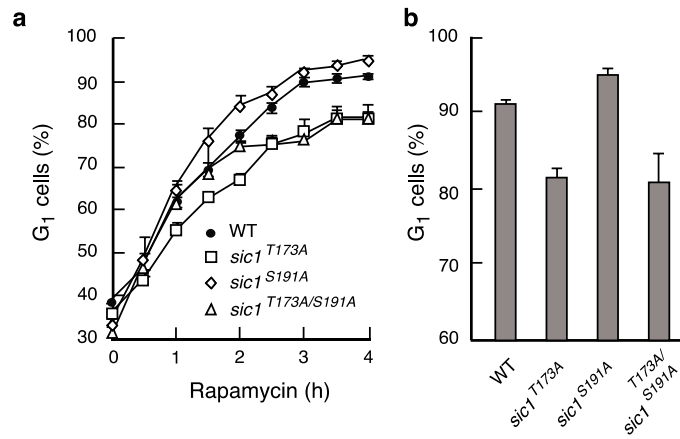

**Supplementary Figure 4 | The Sic1<sup>T173A</sup> allele compromises G<sub>1</sub> arrest in rapamycin-treated cells.** (a) FACS analyses were performed in exponentially growing (0 h) and rapamycin-treated (times indicated) WT, *sic1*<sup>T173A</sup>, *sic1*<sup>S191A</sup>, and *sic1*<sup>T173A/S191A</sup> cells. The experiments were performed independently 3 times for each strain (one representative FACS profile is shown in Fig. 2g) and the quantifications (means ± SD) of the percentage of G<sub>1</sub> cells in the respective populations are presented. (b) Bar graphs show the percentage of G<sub>1</sub> cells in the populations of rapamycin-treated (4 h) strains with the indicated genotypes with error bars indicating the 95% confidence interval. The data points from the 4-h rapamycin treatment were further used to perform an ANOVA analysis, which was followed by a Tukey's post-hoc test to examine the differences for each pair of strains. We found a highly significant difference among the four strains (ANOVA, p-value <0.001). Tukey's post-hoc test indicated that the values for WT and *sic1*<sup>S191A</sup> cells were not significantly different from each other (p-value=0.133); similarly the values for *sic1*<sup>T173A</sup> and *sic1*<sup>T173A/S191A</sup> cells were also not significantly different from each other (p-value=0.97). All other pairwise comparisons were statistically significant (all p-values <0.001), showing that the values for WT and *sic1*<sup>S191A</sup> cells significantly diverged from the ones of the *sic1*<sup>T173A</sup> and *sic1*<sup>T173A/S191A</sup> cells.

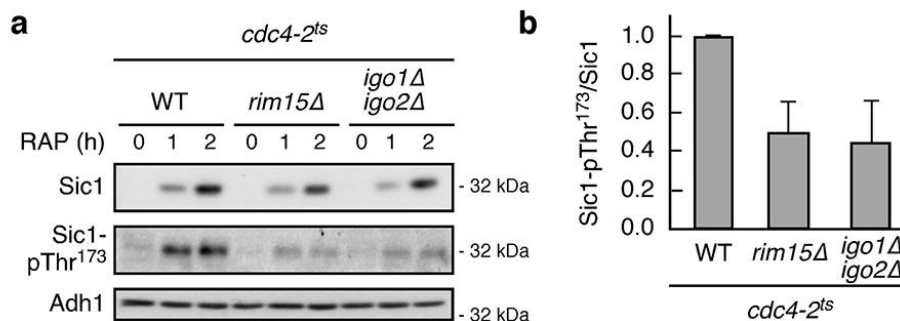

**Supplementary Figure 5 | Inactivation of the SCF<sup>Cdc4</sup> ubiquitin ligase suppresses the defect in Sic1 accumulation, but not in Sic1-Thr<sup>173</sup> phosphorylation, in rapamycin-treated *rim15Δ cdc4-2<sup>ts</sup>* and *igo1Δ igo2Δ cdc4-2<sup>ts</sup>* mutant cells.** (a) Sic1 levels and phosphorylation of Thr<sup>173</sup> in Sic1 (Sic1-pThr<sup>173</sup>) were determined by immunoblot analyses using polyclonal anti-Sic1 and phosphospecific anti-Sic1-pThr<sup>173</sup> antibodies, respectively. Cells (genotypes indicated) were pre-grown exponentially at 24°C (0 h) and then shifted to 37°C for 1 or 2 h (to inactivate Cdc4-2<sup>ts</sup>) in the presence of rapamycin (RAP). Adh1 levels served as loading controls. The experiment was performed independently 3 times and one representative set of blots is shown. (b) Bars represent the ratio between the mean Sic1-pThr<sup>173</sup> levels and Sic1 protein levels (± SD; 3 independent experiments), determined in rapamycin-treated (2h at 37°C) *cdc4-2<sup>ts</sup>*, *rim15Δ cdc4-2<sup>ts</sup>*, and *igo1Δ igo2Δ cdc4-2<sup>ts</sup>* cells and expressed relative to the value in *cdc4-2<sup>ts</sup>* cells (set to 1.0).

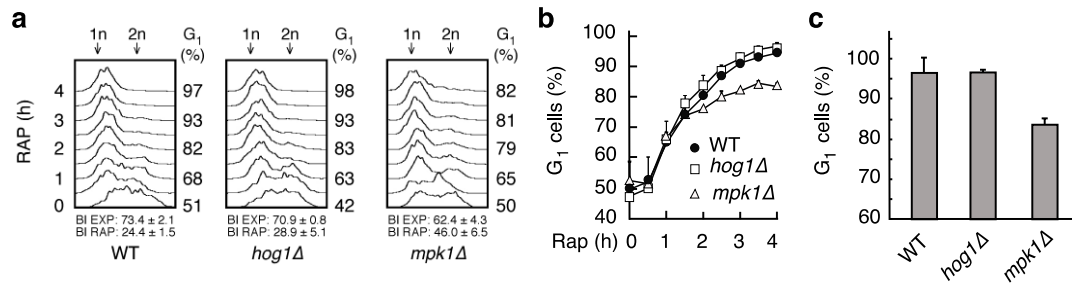

**Supplementary Figure 6 | Loss of Mpk1, but not of Hog1, compromises timely G<sub>1</sub> arrest in rapamycin-treated cells.** (a) FACS analyses were performed in exponentially growing (time 0 h) and rapamycin-treated (times indicated) WT, *hog1Δ*, and *mpk1Δ* cells. FACS and BI analyses were performed as in Fig. 1a. The experiments were performed independently 3 times for each strain (one representative FACS profile is shown). (b) Quantifications (means ± SD) of the percentage of G<sub>1</sub> cells in the respective populations in (a) are presented. (c) Bar graphs showing the percentage of G<sub>1</sub> cells in the populations of rapamycin-treated (4 h) strains with the indicated genotypes with error bars indicating the 95% confidence interval. The data points from the 4-h rapamycin treatment were further used to perform an ANOVA analysis, which was followed by a Tukey's post-hoc test to examine the differences for each pair of strains. We found a highly significant difference among the three strains (ANOVA, p-value <0.001). Tukey's post-hoc test indicated that the values for WT and *hog1Δ* cells were not significantly different from each other (p-value=0.53), but that the values for the *mpk1Δ* cells were significantly different from the other two strains (both p-values <0.002).

**Supplementary Figures 7-25: Original Blots**

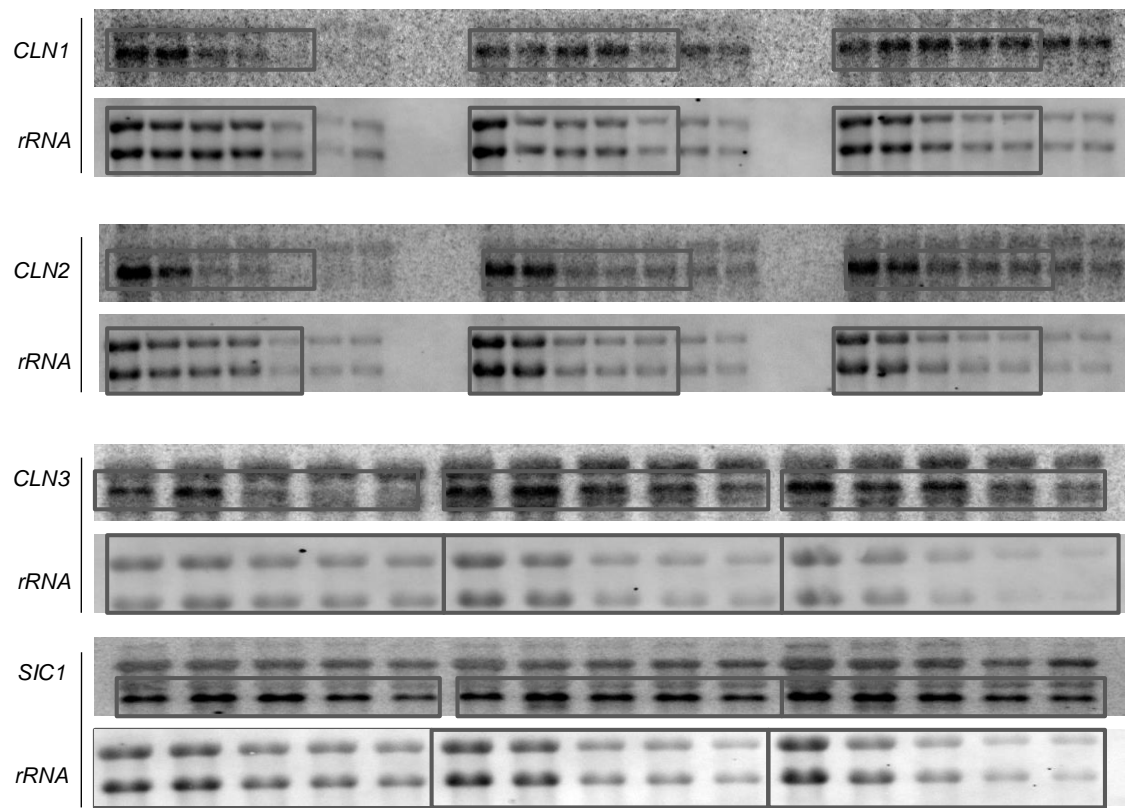

**Supplementary Figure 7 | Full-sized scans of Northern blots in Figure 1e.**

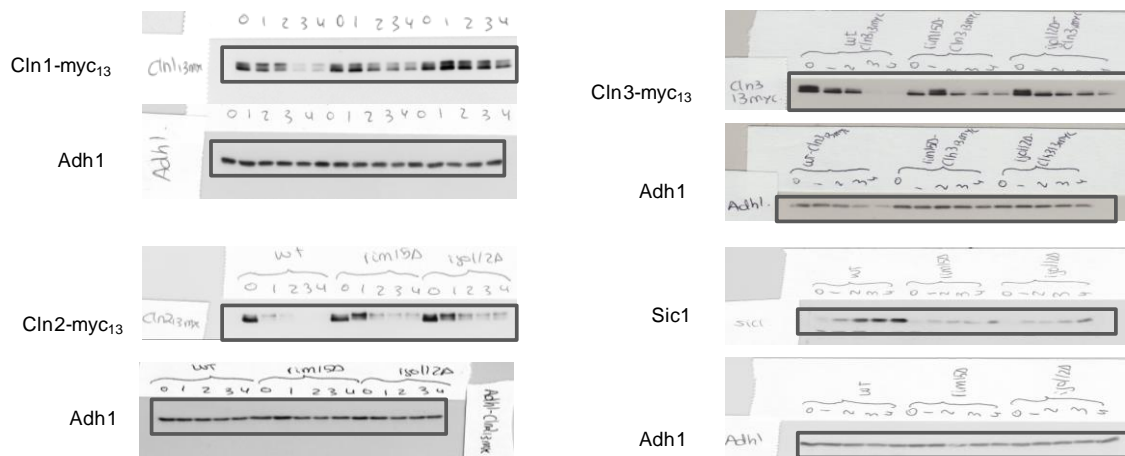

**Supplementary Figure 8 | Full-sized scans of Western blots in Figure 1f.**

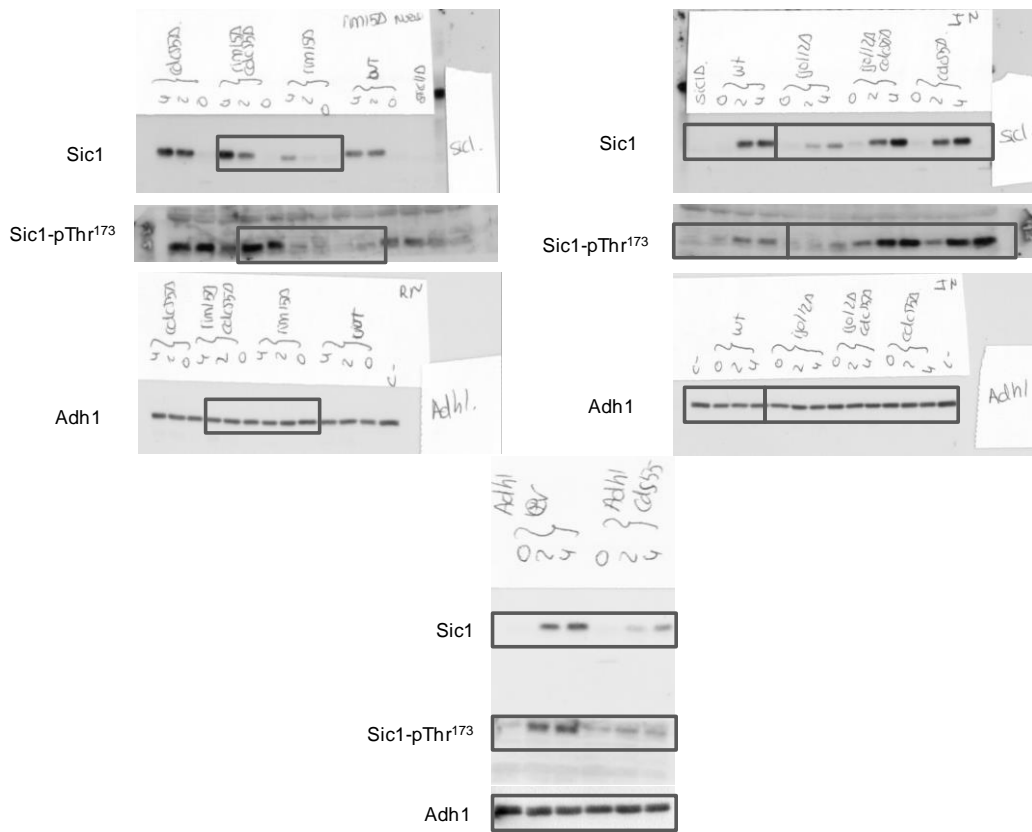

Supplementary Figure 9 | Full-sized scans of Western blots in Figure 2a.

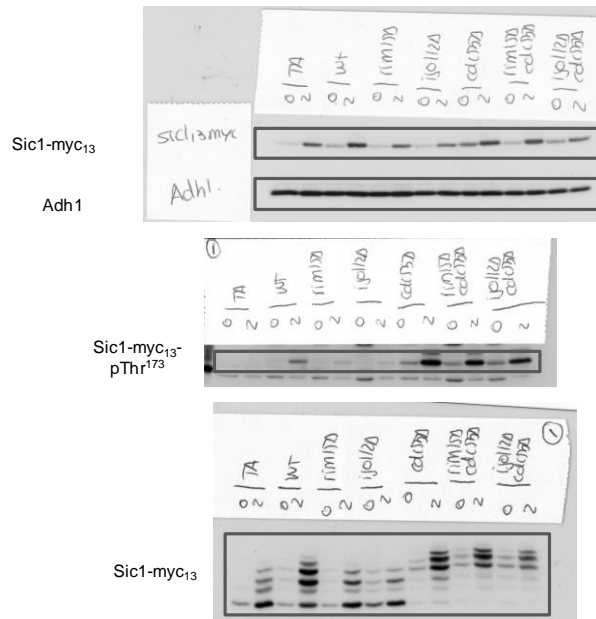

Supplementary Figure 10 | Full-sized scans of Western blots in Figure 2c.

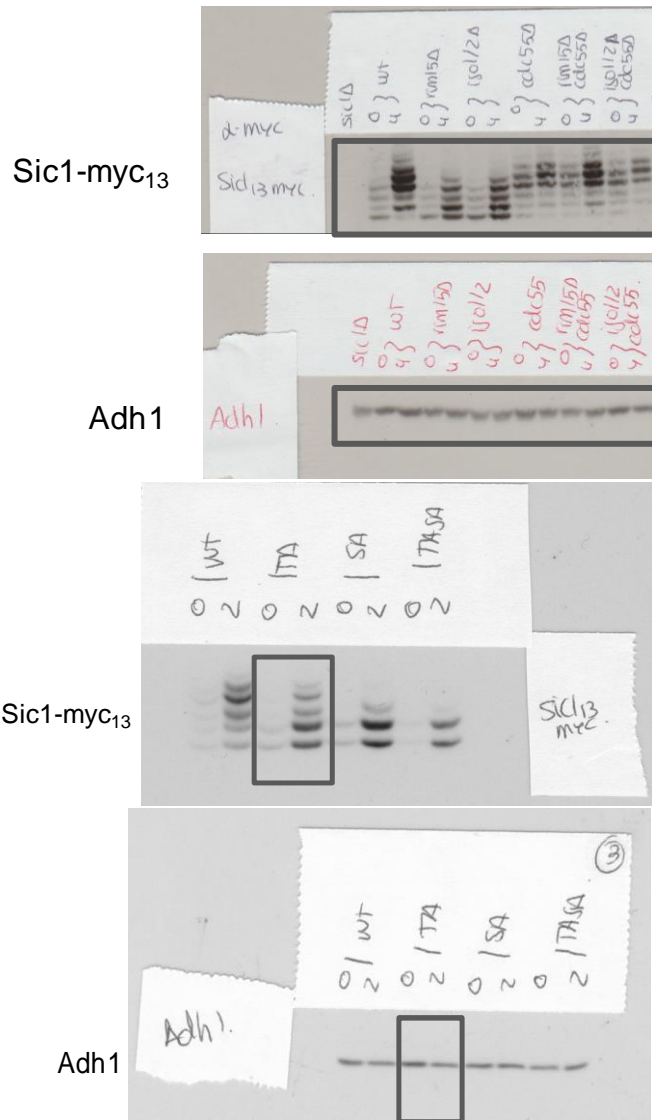

Supplementary Figure 11 | Full-sized scans of Western blots in Figure 2d.

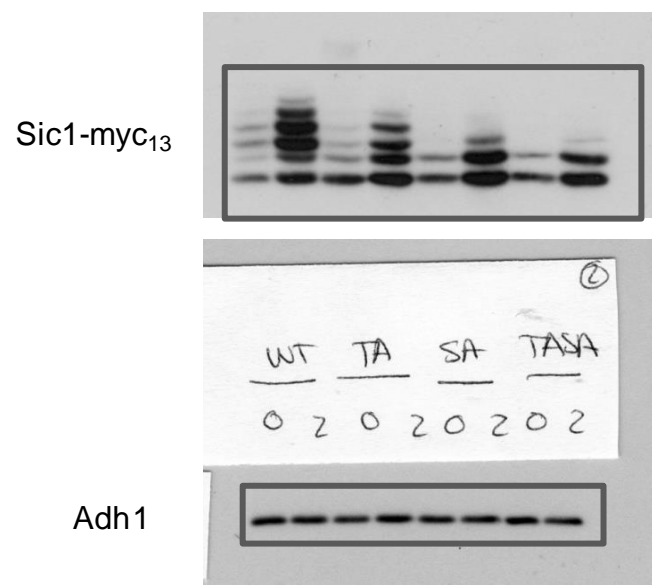

Supplementary Figure 12 | Full-sized scans of Western blots in Figure 2e.

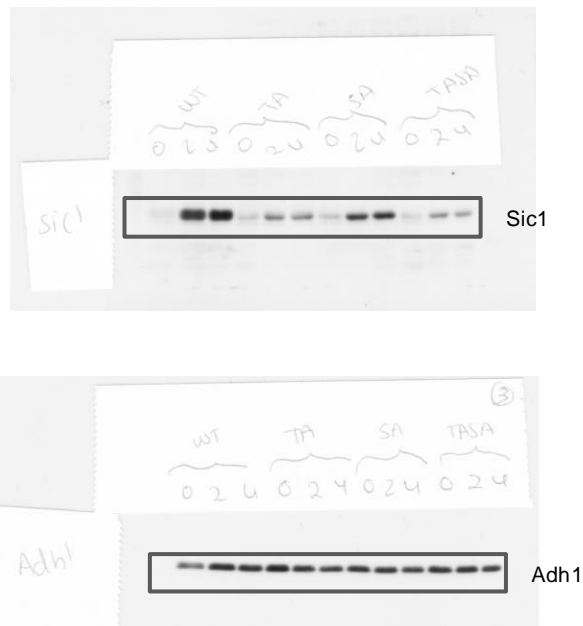

Supplementary Figure 13 | Full-sized scans of Western blots in Figure 2f.

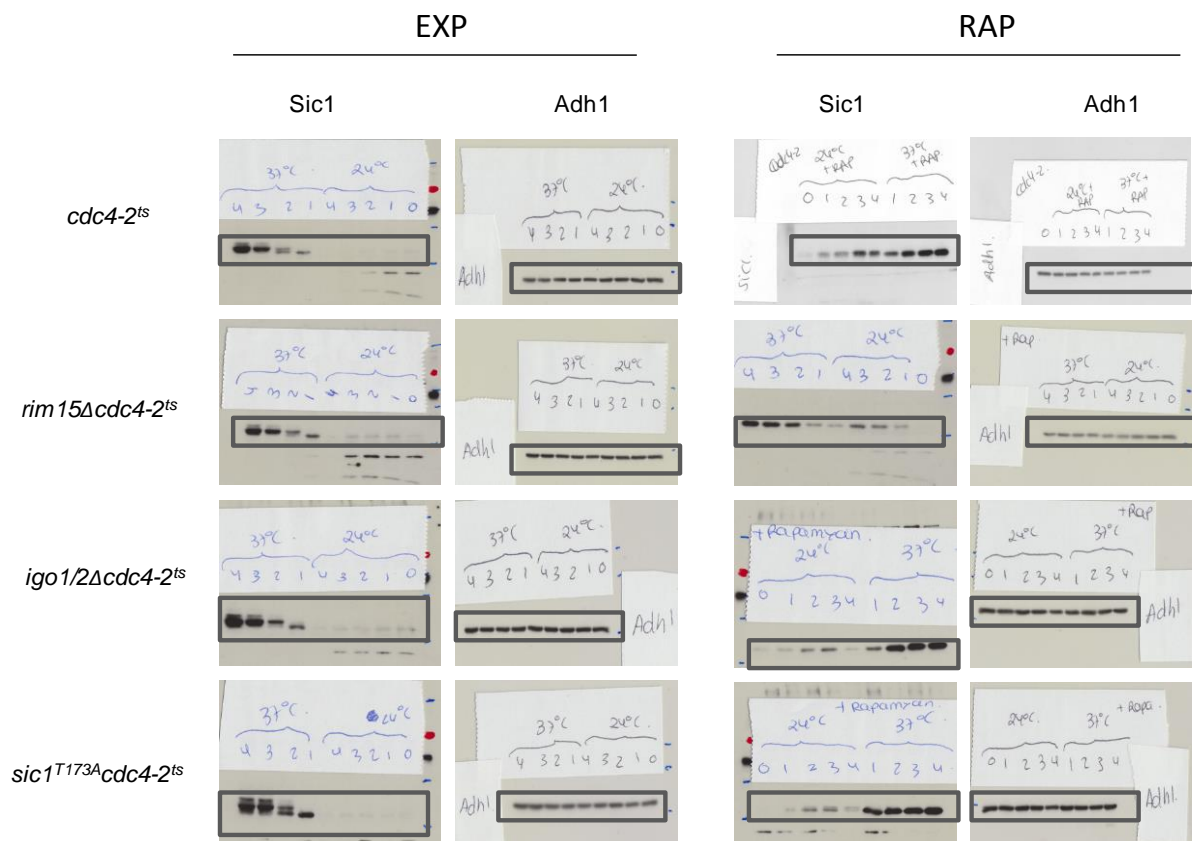

Supplementary Figure 14 | Full-sized scans of Western blots in Figure 3a.

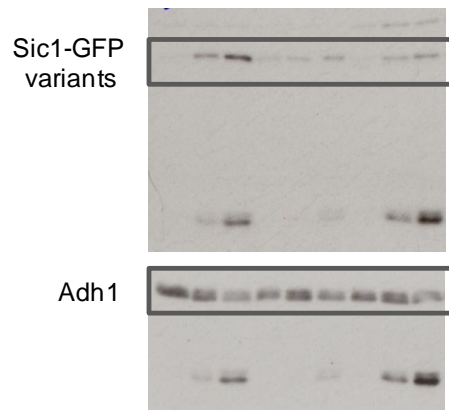

**Supplementary Figure 15 | Full-sized scans of Western blots in Figure 3c.**

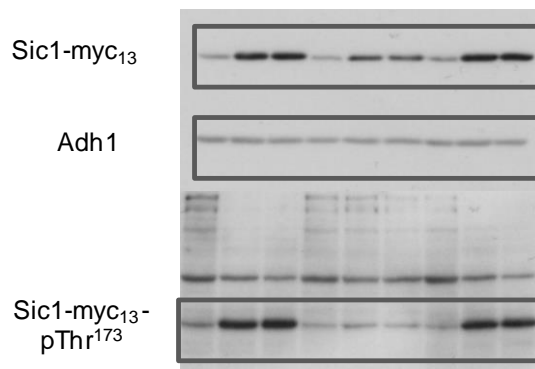

**Supplementary Figure 16 | Full-sized scans of Western blots in Figure 4a.**

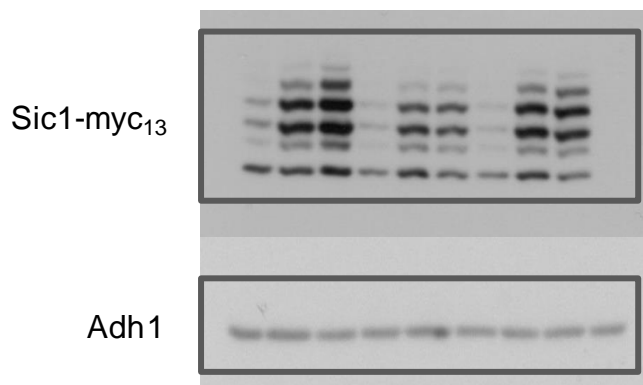

**Supplementary Figure 17 | Full-sized scans of Western blots in Figure 4b.**



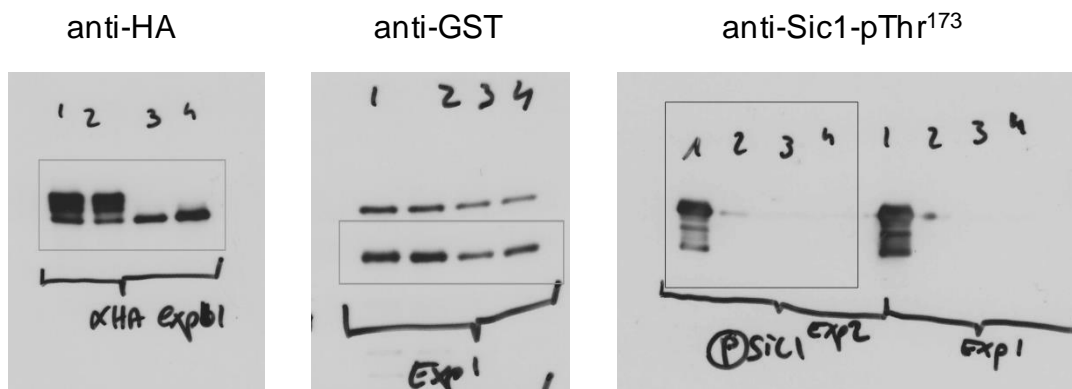

Supplementary Figure 18 | Full-sized scans of Western blots in Figure 4c.

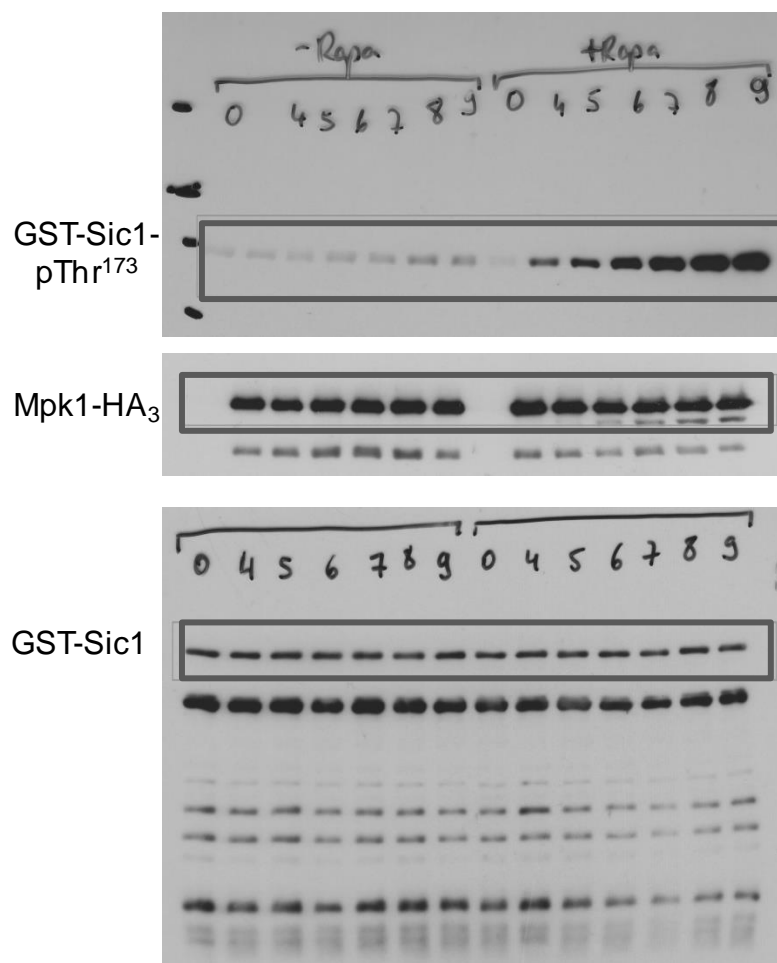

Supplementary Figure 19 | Full-sized scans of Western blots in Figure 4d.

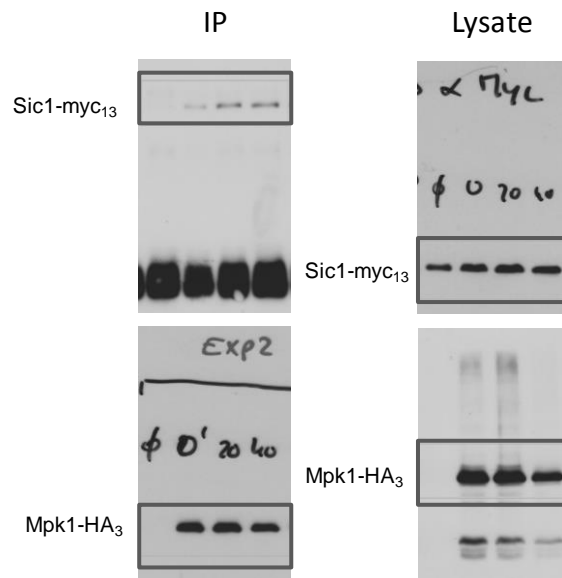

Supplementary Figure 20 | Full-sized scans of Western blots in Figure 4e.

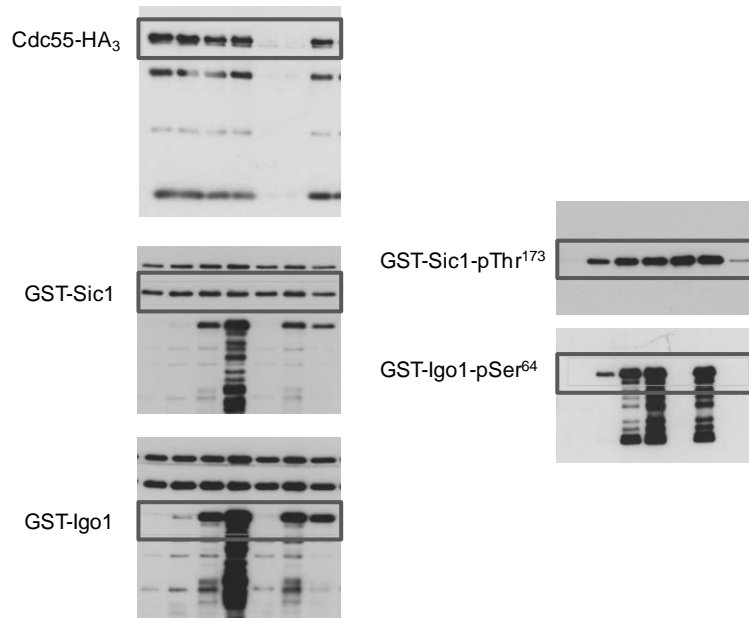

Supplementary Figure 21 | Full-sized scans of Western blots in Figure 5a.

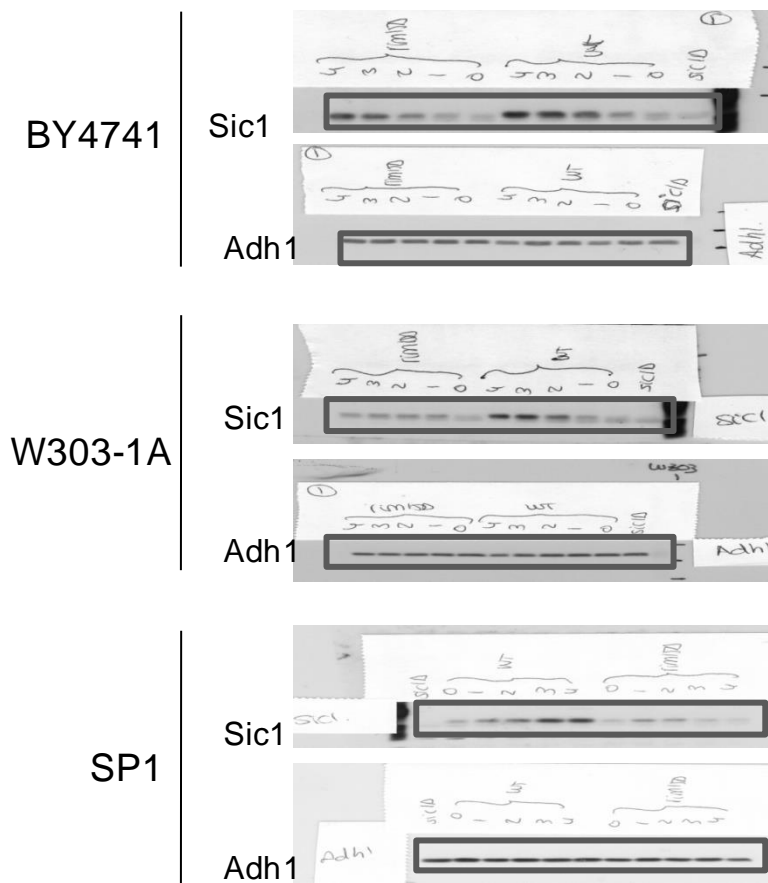

Supplementary Figure 22 | Full-sized scans of Western blots in Supplementary Figure 1.

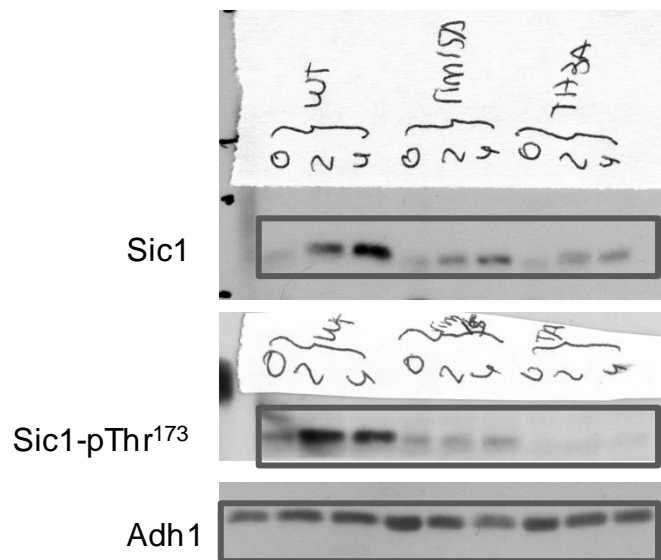

Supplementary Figure 23 | Full-sized scans of Western blots in Supplementary Figure 2.

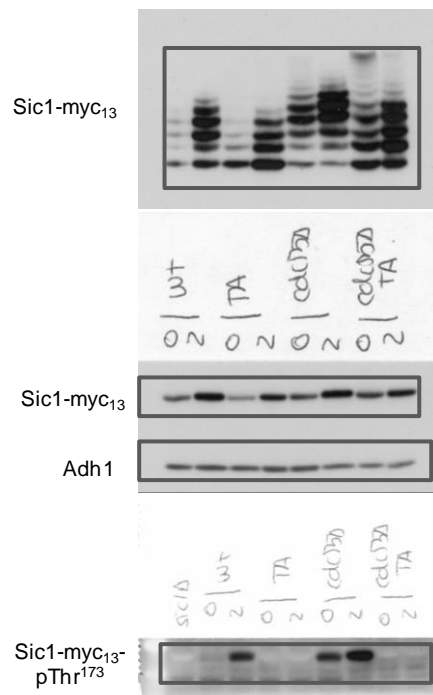

Supplementary Figure 24 | Full-sized scans of Western blots in Supplementary Figure 3.

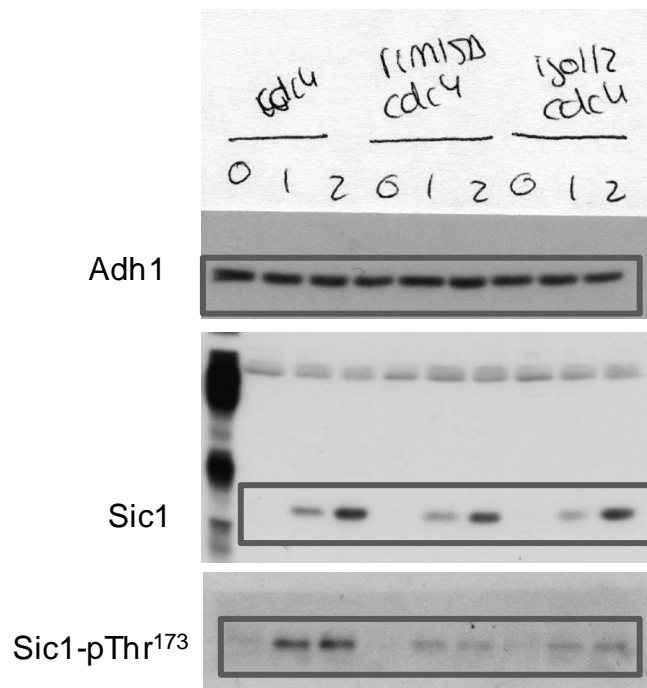

Supplementary Figure 25 | Full-sized scans of Western blots in Supplementary Figure 5.

## Supplementary Tables

**Supplementary Table 1 | Strains Used in This Study.**

| Strain     | Genotype                                                                                  | Source                 | Figure                             |
|------------|-------------------------------------------------------------------------------------------|------------------------|------------------------------------|
| BY4741     | <i>MATa; his3Δ1, leu2Δ0, met15Δ0, ura3Δ0</i>                                              | reference <sup>1</sup> | 1a, S1                             |
| W303-1A    | <i>MATa; ade2-1, trp1-1, can1-100, leu2-3,112, his3-11,15, ura3-1</i>                     |                        | 1a, S1                             |
| SP1        | <i>MATa; leu2, his3, trp1, ade8, ura3, can1</i>                                           | reference <sup>2</sup> | 1a, S1                             |
| JK9-3D     | <i>MATa; leu2, his4, trp1, ura3, rme1, GAL,HMLa</i>                                       | reference <sup>3</sup> | 1b,1d-f,1i, 2a-b, 2f-g, S2, S4, S6 |
| YMM203     | [SP1] <i>rim15Δ::kanMX</i>                                                                | this study             | S1                                 |
| YSB147     | [BY4741] <i>rim15Δ::natMX, MET15</i>                                                      | reference <sup>5</sup> | S1                                 |
| CDV95-4A   | [W303-1A] <i>rim15Δ::kanMX</i>                                                            | this study             | S1                                 |
| IP11       | [JK9-3D] <i>rim15Δ::kanMX</i>                                                             | reference <sup>4</sup> | 1c-f, 1i, 2a, S2                   |
| YMM57-2A   | [JK9-3D] <i>igo1Δ::natMX, igo2Δ::Hph-NT1</i>                                              | this study             | 1c-f, 1i, 2a                       |
| YMM59      | [JK9-3D] <i>CLN1-myc<sub>13</sub>::kanMX</i>                                              | this study             | 1f-g                               |
| YMM60      | [JK9-3D] <i>CLN2-myc<sub>13</sub>::kanMX</i>                                              | this study             | 1f-g                               |
| YMM61      | [JK9-3D] <i>CLN3-myc<sub>13</sub>::kanMX</i>                                              | this study             | 1f, 1h                             |
| YMM87-2D   | [JK9-3D] <i>rim15Δ::kanMX, CLN1-myc<sub>13</sub>::kanMX</i>                               | this study             | 1f-g                               |
| YMM88-12B  | [JK9-3D] <i>rim15Δ::kanMX, CLN2-myc<sub>13</sub>::kanMX</i>                               | this study             | 1f-g                               |
| YMM78-2A   | [JK9-3D] <i>rim15Δ::kanMX, CLN3-myc<sub>13</sub>::kanMX</i>                               | this study             | 1f, 1h                             |
| YMM85-5D   | [JK9-3D] <i>igo1Δ::natMX, igo2Δ::Hph-NT1, CLN1-myc<sub>13</sub>::kanMX</i>                | this study             | 1f-g                               |
| YMM79-9A   | [JK9-3D] <i>igo1Δ::natMX, igo2Δ::Hph-NT1, CLN2-myc<sub>13</sub>::kanMX</i>                | this study             | 1f-g                               |
| YMM80-5C   | [JK9-3D] <i>igo1Δ::natMX, igo2Δ::Hph-NT1, CLN3-myc<sub>13</sub>::kanMX</i>                | this study             | 1f, 1h                             |
| YMM55-1C   | [JK9-3D] <i>rim15Δ::kanMX, cdc55Δ::natMX</i>                                              | this study             | 2a                                 |
| YMM90-3D   | [JK9-3D] <i>igo1Δ::natMX, igo2Δ::Hph-NT1, cdc55Δ::natMX</i>                               | this study             | 2a                                 |
| YMM46      | [JK9-3D] <i>cdc55Δ::natMX</i>                                                             | this study             | 2a, 5a                             |
| YMM98      | [JK9-3D] <i>sic1<sup>T173A</sup>-myc<sub>13</sub>::kanMX, EMP46::natMX</i>                | this study             | 2c-e, S3                           |
| YMM143-2A  | [JK9-3D] <i>sic1<sup>T173A</sup>-myc<sub>13</sub>::kanMX, cdc55Δ::natMX, EMP46::natMX</i> | this study             | S3                                 |
| YMM63      | [JK9-3D] <i>SIC1-myc<sub>13</sub>::kanMX</i>                                              | this study             | 2c-e, S3                           |
| YMM68-9D   | [JK9-3D] <i>rim15Δ::kanMX, SIC1-myc<sub>13</sub>::kanMX</i>                               | this study             | 2c-d                               |
| YMM70-6B   | [JK9-3D] <i>igo1Δ::natMX, igo2Δ::Hph-NT1, SIC1-myc<sub>13</sub>::kanMX</i>                | this study             | 2c-d                               |
| YMM69-1C   | [JK9-3D] <i>cdc55Δ::natMX, SIC1-myc<sub>13</sub>::kanMX</i>                               | this study             | 2c-d, S3                           |
| YMM100-9D  | [JK9-3D] <i>rim15Δ::kanMX, cdc55Δ::natMX, SIC1-myc<sub>13</sub>::kanMX</i>                | this study             | 2c-d                               |
| YMM96      | [JK9-3D] <i>igo1Δ::natMX, igo2Δ::Hph-NT1, cdc55Δ::natMX, SIC1-myc<sub>13</sub>::kanMX</i> | this study             | 2c-d                               |
| YMM91      | [JK9-3D] <i>sic1<sup>T173A</sup>, EMP46::natMX</i>                                        | this study             | 2f-g, S2, S4                       |
| YMM101     | [JK9-3D] <i>sic1<sup>S191A</sup>, EMP46::natMX</i>                                        | this study             | 2f-g, S4                           |
| YMM103     | [JK9-3D] <i>sic1<sup>T173A/S191A</sup>, EMP46::natMX</i>                                  | this study             | 2f-g, S4                           |
| YMM105     | [JK9-3D] <i>sic1<sup>S191A</sup>-myc<sub>13</sub>::kanMX, EMP46::natMX</i>                | this study             | 2e                                 |
| YMM133     | [JK9-3D] <i>sic1<sup>T173A/S191A</sup>-myc<sub>13</sub>::kanMX, EMP46::natMX</i>          | this study             | 2e                                 |
| YMM114     | [JK9-3D] <i>cdc4-2::kanMX</i>                                                             | this study             | 3a-b, S5                           |
| YMM117-3A  | [JK9-3D] <i>rim15Δ::kanMX, cdc4-2::kanMX</i>                                              | this study             | 3a-b, S5                           |
| YMM116-4A  | [JK9-3D] <i>igo1Δ::natMX, igo2Δ::Hph-NT1, cdc4-2::kanMX</i>                               | this study             | 3a-b, S5                           |
| YMM118-2D  | [JK9-3D] <i>sic1<sup>T173A</sup>, EMP46::natMX, cdc4-2::kanMX</i>                         | this study             | 3a-b                               |
| YMM77      | [JK9-3D] <i>SIC1-GFP(S65T)::kanMX</i>                                                     | this study             | 3c-d                               |
| YMM97-7B   | [JK9-3D] <i>rim15Δ::kanMX, SIC1-GFP(S65T)::kanMX</i>                                      | this study             | 3c                                 |
| YMM99      | [JK9-3D] <i>sic1<sup>T173A</sup>-GFP(S65T)::kanMX</i>                                     | this study             | 3c-d                               |
| YMM67-1C   | [JK9-3D] <i>sic1Δ::kanMX</i>                                                              | this study             | 2a                                 |
| YMM53      | [JK9-3D] <i>mpk1Δ::kanMX</i>                                                              | this study             | 4c-f, S6                           |
| YMM65-2D   | [JK9-3D] <i>mpk1Δ::kanMX, SIC1-myc<sub>13</sub>::kanMX</i>                                | this study             | 4a-b                               |
| YMM204-14C | [JK9-3D] <i>hog1Δ::kanMX, SIC1-myc<sub>13</sub>::kanMX</i>                                | this study             | 4a-b                               |
| YMM64-3C   | [JK9-3D] <i>rim15Δ::kanMX, mpk1Δ::kanMX</i>                                               | this study             | 4f                                 |
| YMM111-2A  | [JK9-3D] <i>igo1Δ::natMX, igo2Δ::Hph-NT1, mpk1Δ::kanMX</i>                                | this study             | 4f                                 |
| YMM130     | [JK9-3D] <i>hog1Δ::kanMX</i>                                                              | this study             | S6                                 |

**Supplementary Table 2 | Plasmids Used in This Study.**

| Plasmid  | Genotype                                           | Source                 | Figure   |
|----------|----------------------------------------------------|------------------------|----------|
| pRS416   | <i>CENARS, URA3</i>                                | reference <sup>1</sup> | 1b       |
| pMM5     | [pRS416] <i>RME1</i>                               | this study             | 1b       |
| p1308    | [pRS414]                                           | reference <sup>1</sup> | 1d, 2d   |
| p1309    | [pRS415]                                           | reference <sup>1</sup> | 1d, 2d   |
| p1310    | [pRS416]                                           | reference <sup>1</sup> | 1d, 2d   |
| pMM10    | [pRS415] <i>HIS4</i>                               | this study             | 1d, 2d   |
| pSB004   | [pRS416] <i>ADH1p-CDC55</i>                        | reference <sup>5</sup> | 2a-b     |
| p834     | [pRS416] <i>ADH1p</i>                              | reference <sup>6</sup> | 2a-b     |
| pMM6     | [pRS416] <i>MPK1-HA<sub>3</sub></i>                | this study             | 4c-e     |
| pMM7     | [pRS416] <i>mpk1<sup>K54R</sup>-HA<sub>3</sub></i> | this study             | 4c       |
| pMM8     | pGEX- <i>SIC1</i>                                  | this study             | 4c-d, 5a |
| pMM9     | pGEX- <i>sic1<sup>T173A</sup></i>                  | this study             | 4c       |
| pMJA2610 | [pRS416] <i>CDC55-HA<sub>3</sub></i>               | this study             | 5a       |
| pCDV487  | pHAC195- <i>GALI-GST-RIM15, 2 μ,URA3</i>           | reference <sup>4</sup> | 5a       |
| pLC1092  | pGEX- <i>IGO1</i>                                  | reference <sup>7</sup> | 5a       |
| pLC1134  | pGEX- <i>igo1<sup>S64A</sup></i>                   | reference <sup>7</sup> | 5a       |

**Supplementary References**

1. Brachmann, C.B. *et al.* Designer deletion strains derived from *Saccharomyces cerevisiae* S288C: a useful set of strains and plasmids for PCR-mediated gene disruption and other applications. *Yeast* **14**, 115-132 (1998).
2. Toda, T. *et al.* In yeast, RAS proteins are controlling elements of adenylate cyclase. *Cell* **40**, 27-36 (1985).
3. Heitman, J., Movva, N.R. & Hall, M.N. Targets for cell cycle arrest by the immunosuppressant rapamycin in yeast. *Science* **253**, 905-909 (1991).
4. Pedruzzi, I. *et al.* TOR and PKA signaling pathways converge on the protein kinase Rim15 to control entry into G<sub>0</sub>. *Mol. Cell* **12**, 1607-1613 (2003).
5. Bontron, S. *et al.* Yeast endosulfines control entry into quiescence and chronological life span by inhibiting protein phosphatase 2A. *Cell Rep* **3**, 16-22 (2013).
6. Mumberg, D., Müller, R. & Funk, M. Yeast vectors for the controlled expression of heterologous proteins in different genetic backgrounds. *Gene* **156**, 119-122 (1995).
7. Talarek, N. *et al.* Initiation of the TORC1-regulated G<sub>0</sub> program requires Igo1/2, which license specific mRNAs to evade degradation via the 5'-3' mRNA decay pathway. *Mol Cell* **38**, 345-355 (2010).
